# Supplementary material
Source: PubMed Central journal article supplement (PMC3570051)
Supplement: supp_mjs042_mjs042supp.pdf [file supp_mjs042_mjs042supp.pdf]

## Supplementary figures legends

### STable 1. Marker expressions representing each cell type.

**SFigure 1. CD133<sup>+</sup> cell numbers increase upon ADT/Casodex treatment.** **a.** Flow cytometric analysis of CD133<sup>+</sup> cells of LNCaP cell line upon Casodex (1  $\mu$ M) treatment. Gradual increase in the CD133<sup>+</sup> cells at 1, wk 3, and wk 5 is shown. **b.** Flow cytometric analysis of CD133<sup>+</sup> cells of C4-2 cell line upon Casodex treatment. **c-f.** Human patient tissue staining of CD133, CD44, integrin, CK5, and CK8, before and after ADT.

**SFigure 2. Separation of stem/progenitor and non-stem/progenitor cells from C4-2 and LAPC-4 cells.** **A. C4-2 cell line data.** **a.** Flow cytometric separation of stem/progenitor cells using antibodies of CD133 and integrin. **b.** Morphology of stem/progenitor cells isolated. **c.** IF staining showing markers expressions in stem/progenitor and non-stem/progenitor cells. **d.** Western blot analysis of CD133, integrin, and PSA in stem/progenitor and non-stem/progenitor cells. **e.** Colony formation assay on soft agarose of stem/progenitor and non-stem/progenitor cells. **f.** Invasion and migration assay results of stem/progenitor and non-stem/progenitor cells. **B. LAPC-4 cell line data.** **a.** Flow cytometric separation of stem/progenitor cells using antibodies of CD133 and CD44. **b.** Morphology of stem/progenitor cells isolated. **c.** IF staining result showing marker expressions in stem/progenitor and non-stem/progenitor cells. All experiments were done three times (\* $p < 0.05$ , \*\* $p < 0.01$  with student  $t$  test).

**SFigure 3. Characteristics of Celprogen-PCSCs and AR expression effect on their self-renewal/proliferation.** **a.** Flow Cytometric separation of CD44<sup>+</sup>/integrin<sup>+</sup> cells. **b.** Morphology. **c.** Sphere formation on Matrigel. **d.** qPCR analysis results showing expression of S/P markers. The mRNAs of LNCaP and PC3 cells were used as controls. **e.** qPCR analysis results analyzing expression of AR mRNAs. **f.** Western blot analysis showing AR protein expressions. **g.** qPCR

analysis of AR mRNA expression when cells were grown in normal culture condition or as spheres on Matrigel coated plates. **h.** Growth analysis of parental, vector (V) or AR expressing stable clones (AR4 and AR12). AR expression in these clone cells were shown in lower panel. **i.** Sphere formation assay using AR expressing AR4 cells and vector control cells. **j.** qPCR analysis of AR mRNA expression in S/P cells grown in attached form and sphere form. All experiments were done three times ( $*p < 0.05$ ,  $**p < 0.01$  with student *t* test).

**Figure 4. Opposite roles of AR in self-renewal/proliferation of stem/progenitor and non-stem/progenitor cells of C4-2 cell line.** All assays were performed after infection of stem/progenitor and non-stem/progenitor cells with lentivirus carrying vector or AR. **a.** MTT assay. Three different DHT concentrations were used (1 and 10 nM). **b.** Soft Agar colony formation assay. **c.** IF staining using Ki67 antibody. **d.** BrdU labeling IHC. **e.** Sphere formation assay. All experiments were done three times ( $*p < 0.05$ ,  $**p < 0.01$  with student *t* test).

**Figure 5. Opposite roles of AR in self-renewal/proliferation of stem/progenitor and non-stem/progenitor cells of LAPC-4 cell line.** All assays were performed after infection of LAPC-4-stem/progenitor and non-stem/progenitor cells with lentivirus carrying vector (V), AR or AR-siRNA. **a.** Soft Agar colony formation assay. **b.** BrdU labeling IHC. **c.** Sphere formation assay. All experiments were done three times ( $*p < 0.05$ ,  $**p < 0.01$  with student *t* test).

**Figure 6. Activation of molecules in AR depleted stem/progenitor cells of C4-2 and PCSC cell lines.** **a.** Western blot analysis of the indicated signal molecules using cell extracts of parental, stem/progenitor, and non-stem/progenitor cells of C4-2 cell line. **b.** Western blot analysis using cell extracts of stem/progenitor cells after vector (V)/AR carrying lentiviral infection. **c.** Western blot analysis using cell extracts of parental, vector or AR transfected PCSCs.

**Figure 7. Induction of AR expression upon 5-AZA treatment in LNCaP stem/progenitor and non-stem/progenitor cells.** **a.** qPCR analysis showing AR mRNA expression. LNCaP stem/progenitor cells (CD133<sup>+</sup>) cells were treated with 5 μM of 5-AZA for indicated times. **b.** Same treatment as 7a with LNCaP non-stem/progenitor (CD133<sup>-</sup>) cells. **c.** MTT assay of LNCaP-stem/progenitor cells to obtain IC<sub>50</sub> for two combinations of drugs. For H (high) dose: γ-TT, 5 μM and 5-AZA, 5 μM was used and for M (medium) dose: γ-TT, 2.5 μM and 5-AZA, 2.5 μM was used, and for L (low) dose, γ-TT, 1 μM and 5-AZA, 1 μM was used.

**Supplementary Figure 1.**

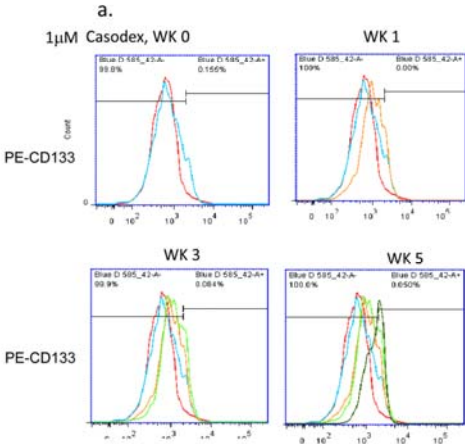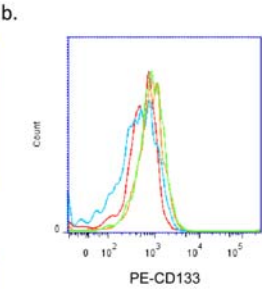

**c. CD133 staining**

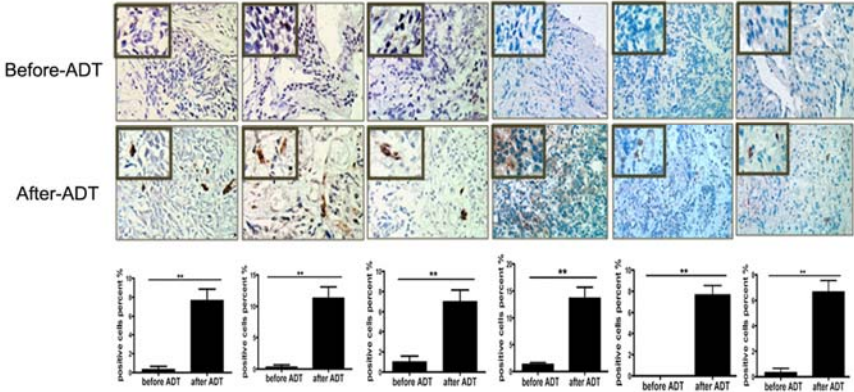

**d. CD44 staining**

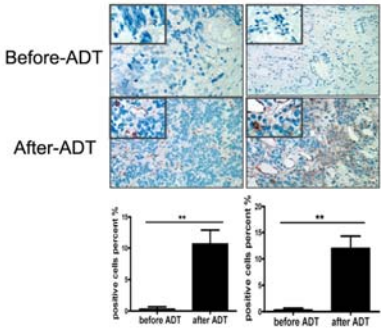

**e. CK5 staining**

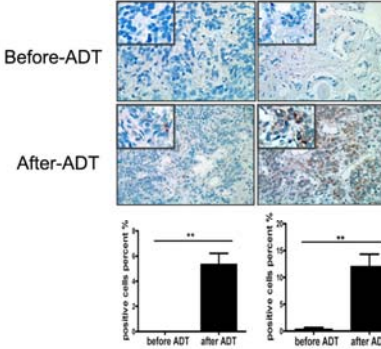

**f. CK8 staining**

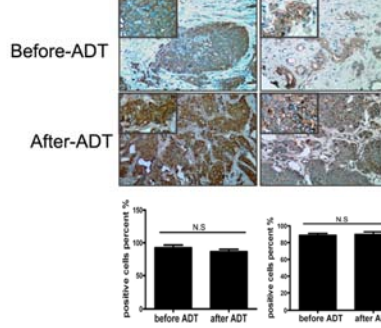

Supplementary Figure 2.

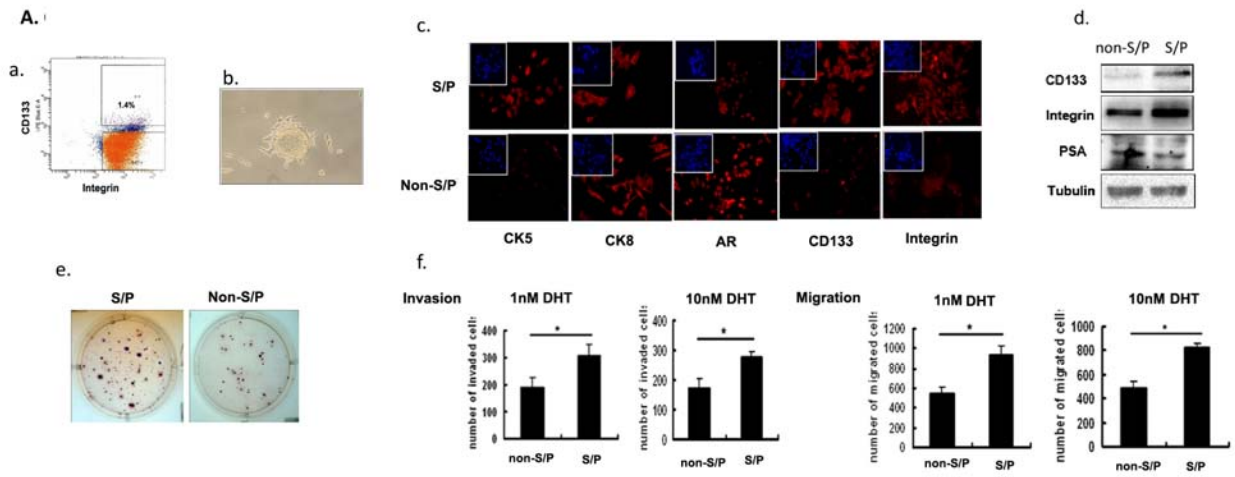

**B.**

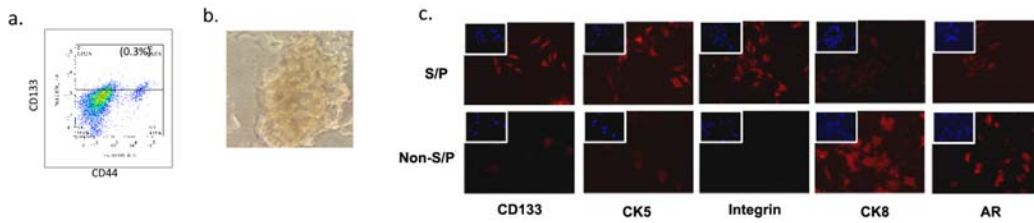

Supplementary Figure 3.

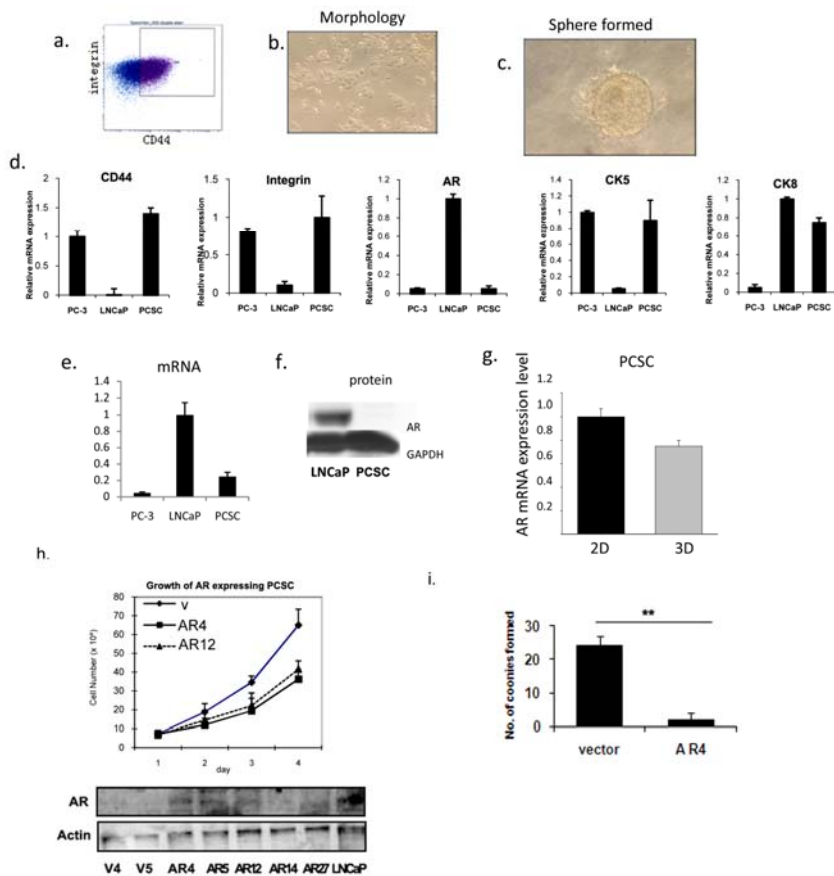

**Supplementary Figure 4.**

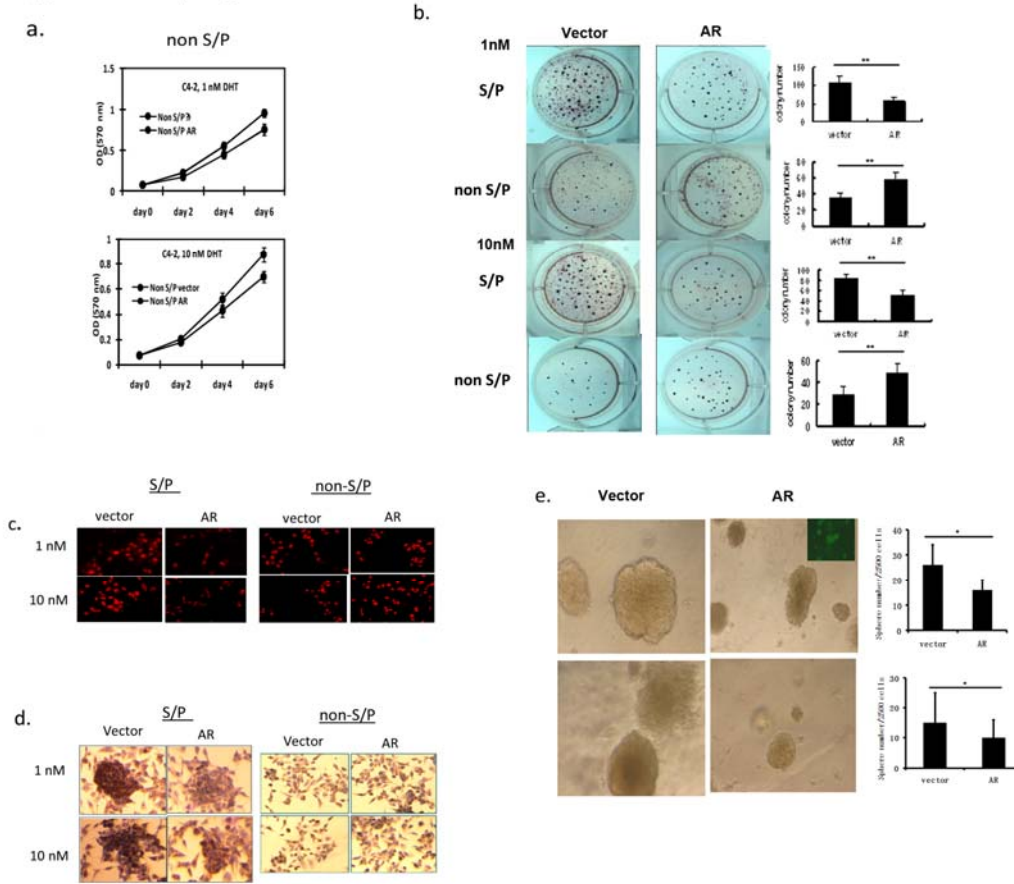

**Supplementary Figure 5.**

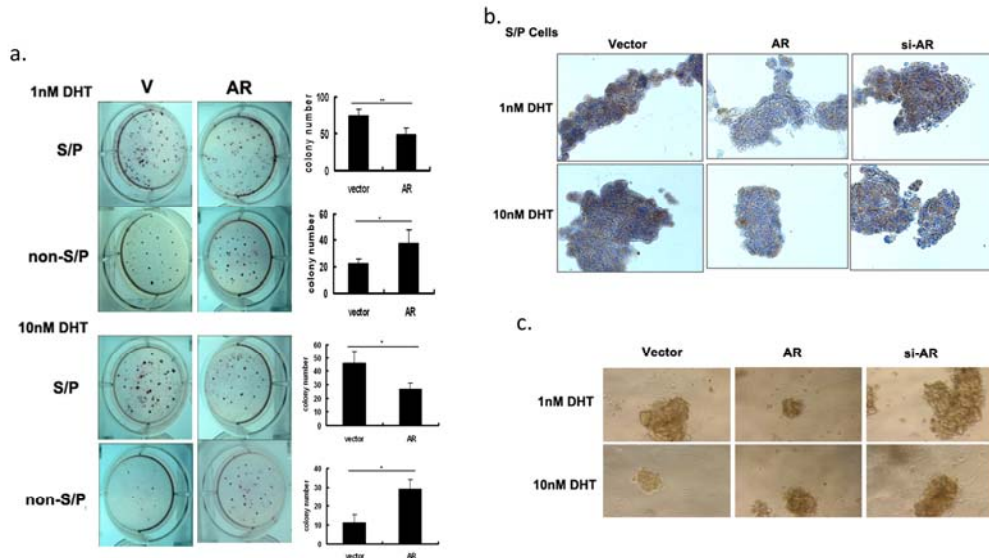

## Supplementary Figure 6.

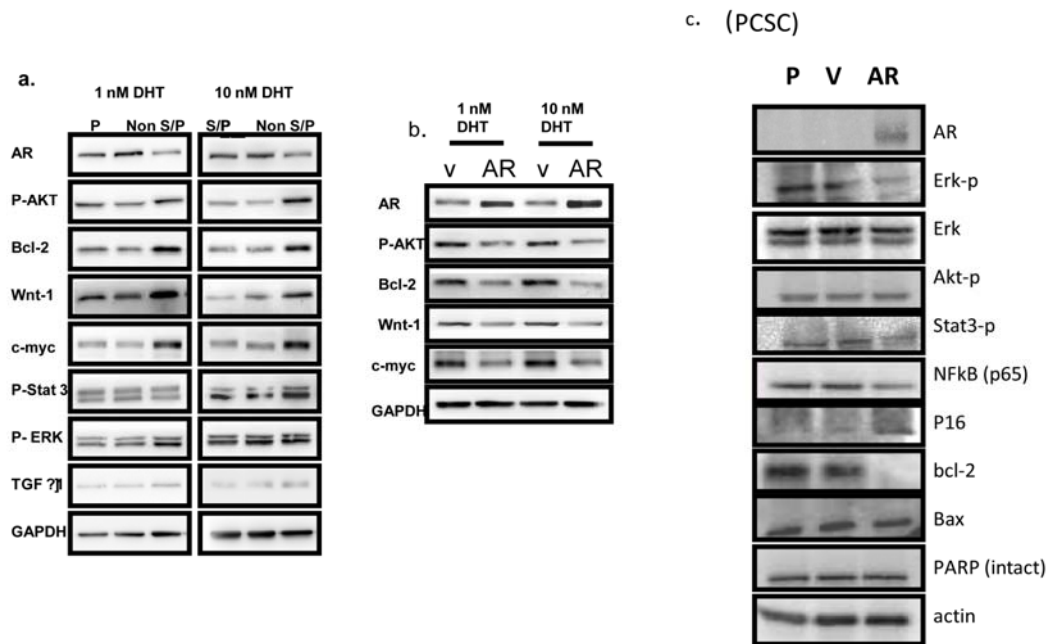

## Supplementary Figure 7.

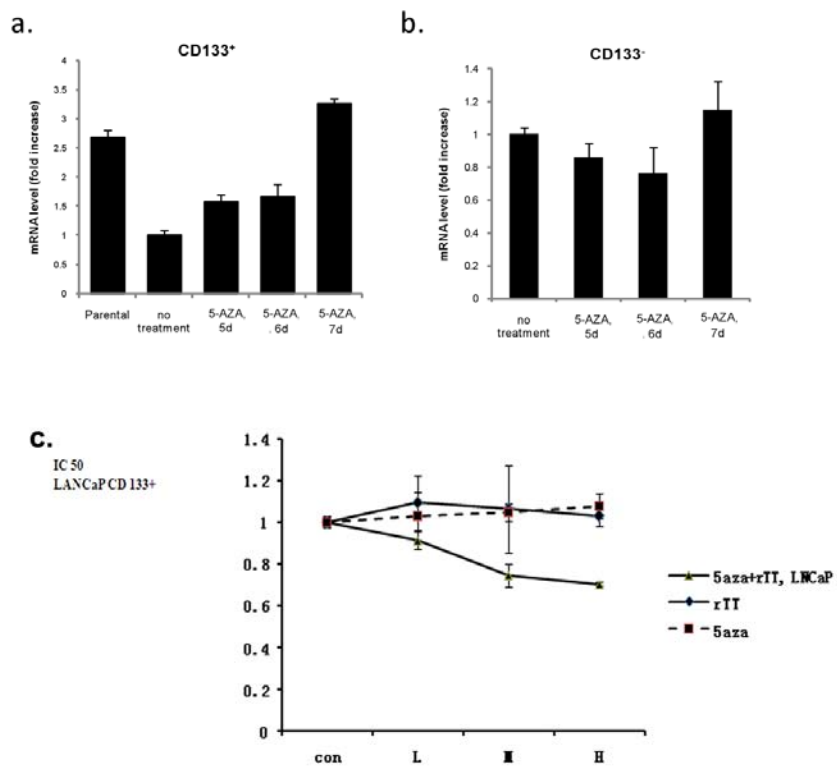

**Supplementary  
STable 1.**



← Basal † † † Luminal →

|          | Stem | Progenitor/<br>Transit<br>Amplifying cells | Intermediate | Luminal |
|----------|------|--------------------------------------------|--------------|---------|
| CD133    | ++   | -/+                                        | -            | -       |
| Integrin | ++   | ++                                         | +/-          | -       |
| CD44     | ++   | ++                                         | +            | -       |
| CK5      | +++  | ++                                         | +            | -       |
| CK8      | -    | +                                          | ++           | +++     |
| AR       | -    | -/+                                        | -/+          | +++     |
